# Supplementary material for: Initial resistance to companion drugs should not be considered an exclusion criterion for the shorter multidrug-resistant tuberculosis treatment regimen
Source: PubMed Central journal article supplement — Int J Infect Dis. 2020 Nov;100:357–65. doi: 10.1016/j.ijid.2020.08.042 (PMC7670168; doi:10.1016/j.ijid.2020.08.042), 2020-11
Supplement: mmc1.pdf [file mmc1.pdf]

Supplementary Table 1. Classification of drug resistance (level) per drug. R=resistant; S=susceptible; MIC=minimum inhibitory concentration; WT=wild type

| Drug                 | Resistance classification                                                                                                                                                                                                                                                                                                                                                                                                                                                                                                      |
|----------------------|--------------------------------------------------------------------------------------------------------------------------------------------------------------------------------------------------------------------------------------------------------------------------------------------------------------------------------------------------------------------------------------------------------------------------------------------------------------------------------------------------------------------------------|
| Fluoroquinolones     | See flowchart below.                                                                                                                                                                                                                                                                                                                                                                                                                                                                                                           |
| Clofazimine          | Isolates with a clofazimine resistance-associated variant reported by TBProfiler (based on the literature-based TBProfiler library database) were considered resistant, those without were considered susceptible.                                                                                                                                                                                                                                                                                                             |
| Ethambutol           | Isolates with an ethambutol resistance-associated variant reported by TBProfiler (based on the literature-based TBProfiler library database) were considered resistant, those without were considered susceptible.                                                                                                                                                                                                                                                                                                             |
| Prothionamide        | Isolates with an ethionamide resistance-associated variant reported by TBProfiler (based on the literature-based TBProfiler library database) were considered resistant, those without were considered susceptible. Isolates with an <i>inhA</i> or <i>fabG1</i> variant reported by TBProfiler for isoniazid but not for ethionamide were considered resistant to ethionamide as well.                                                                                                                                        |
| Isoniazid phenotypic | susceptible: susceptible at 0.2 mg/L - low-level resistant: resistant at 0.2 mg/L but susceptible at 1.0 mg/L or MIC $\leq$ 1.6 mg/L - moderate-level resistant: resistant at 1.0 mg/L but susceptible at 5.0 mg/L or $3.2 \leq$ MIC $\leq$ 6.4 mg/L - high-level resistant: resistant at 5.0 mg/L, or MIC $\geq$ 12.8 mg/L                                                                                                                                                                                                    |
| Isoniazid genotypic  | susceptible: no isoniazid resistance-associated variant reported by TBProfiler (based on the literature-based TBProfiler library database) - low-level resistant: <i>inhA</i> or <i>fabG1</i> mutation alone - moderate-level resistant: <i>katG</i> mutation alone; or <i>inhA</i> and <i>fabG1</i> mutation - high-level resistant: <i>katG</i> and <i>inhA</i> mutation; or <i>katG</i> and <i>fabG1</i> mutation; or two <i>katG</i> mutations; or <i>katG</i> insertion, deletion, or introduction of a termination codon |
| Isoniazid composite  | Isoniazid phenotypic and genotypic resistance levels as described above were combined. In case of discordance between phenotypic and genotypic level, the highest level was taken as final.                                                                                                                                                                                                                                                                                                                                    |
| Kanamycin            | Isolates resistant at 6.0 mg/L and/or having a kanamycin resistance-associated variant reported by TBProfiler (based on the literature-based TBProfiler library database) were considered resistant, all others susceptible.                                                                                                                                                                                                                                                                                                   |
| Pyrazinamide         | Isolates with a pyrazinamide resistance-associated variant reported by TBProfiler (based on the literature-based TBProfiler library database) were considered resistant, those without were considered susceptible.                                                                                                                                                                                                                                                                                                            |

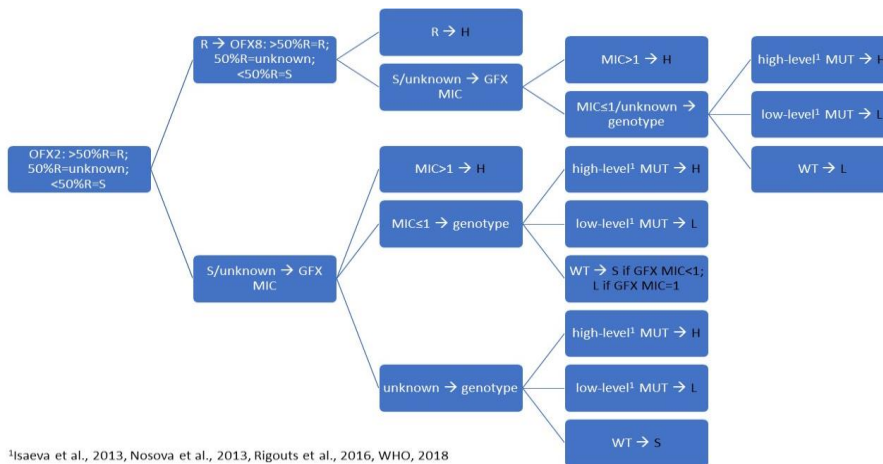

<sup>1</sup>Isaeva et al., 2013, Nosova et al., 2013, Rigouts et al., 2016, WHO, 2018

Supplementary Figure 1. Flowchart showing classification of fluoroquinolone drug susceptibility test (DST) results into susceptible (S), low-level resistant (L), and high-level resistant (H). For ofloxacin DST, all DST results of a patient were considered. An isolate was considered resistant if >50% of tests from the same patient was R, and susceptible if >50% was S. When the number of resistant tests was equal to the number of susceptible tests, no conclusion was drawn (unknown). OFX=ofloxacin; GFX=gatifloxacin; R=resistant; S=susceptible; MIC=minimum inhibitory concentration; WT=wildtype; MUT=mutant

#### Literature

- Isaeva Y, Bukatina A, Krylova L, Nosova E, Makarova M, Moroz A. Determination of critical concentrations of moxifloxacin and gatifloxacin for drug susceptibility testing of Mycobacterium tuberculosis in the BACTEC MGIT 960 system. *J Antimicrob Chemother* 2013;68(10):2274-81.
- Nosova EY, Bukatina AA, Isaeva YD, Makarova MV, Galkina KY, Moroz AM. Analysis of mutations in the *gyrA* and *gyrB* genes and their association with the resistance of Mycobacterium tuberculosis to levofloxacin, moxifloxacin and gatifloxacin. *J Med Microbiol* 2013;62(Pt 1):108-13.
- Rigouts L, Coeck N, Gumusboga M, de Rijk WB, Aung KJ, Hossain MA, et al. Specific *gyrA* gene mutations predict poor treatment outcome in MDR-TB. *J Antimicrob Chemother* 2016;71(2):314-23.
- WHO. [Technical report on critical concentrations for TB drug susceptibility testing of medicines used in the treatment of drug-resistant TB](https://www.who.int/tb/publications/2018/WHO_technical_report_concentrations_TB_drug_susceptibility/en/); 2018. Available from: [https://www.who.int/tb/publications/2018/WHO\\_technical\\_report\\_concentrations\\_TB\\_drug\\_susceptibility/en/](https://www.who.int/tb/publications/2018/WHO_technical_report_concentrations_TB_drug_susceptibility/en/).
